# Supplementary material for: A paradigm of extreme rainfall pluvial floods in complex urbanareas: the flood event of 15 July 2020 in Palermo (Italy)
Source: Copernicus journal article supplement (doi:10.5194/nhess-2021-61), 2021-03-04
Supplement: Supplementary file 1 [file nhess-2021-61-supplement.pdf]

# A paradigm of extreme rainfall pluvial floods in complex urban areas: the flood event of 15 July 2020 in Palermo (Italy).

Antonio Francipane<sup>1</sup>, Dario Pumo<sup>1</sup>, Marco Sinagra<sup>1</sup>, Goffredo La Loggia<sup>1</sup>, Leonardo V. Noto<sup>1</sup>

<sup>1</sup>Department of Engineering, University of Palermo, Palermo, 90158, ITALY

5 Correspondence to: Antonio Francipane ([antonio.francipane@unipa.it](mailto:antonio.francipane@unipa.it))

## Supplementary Material

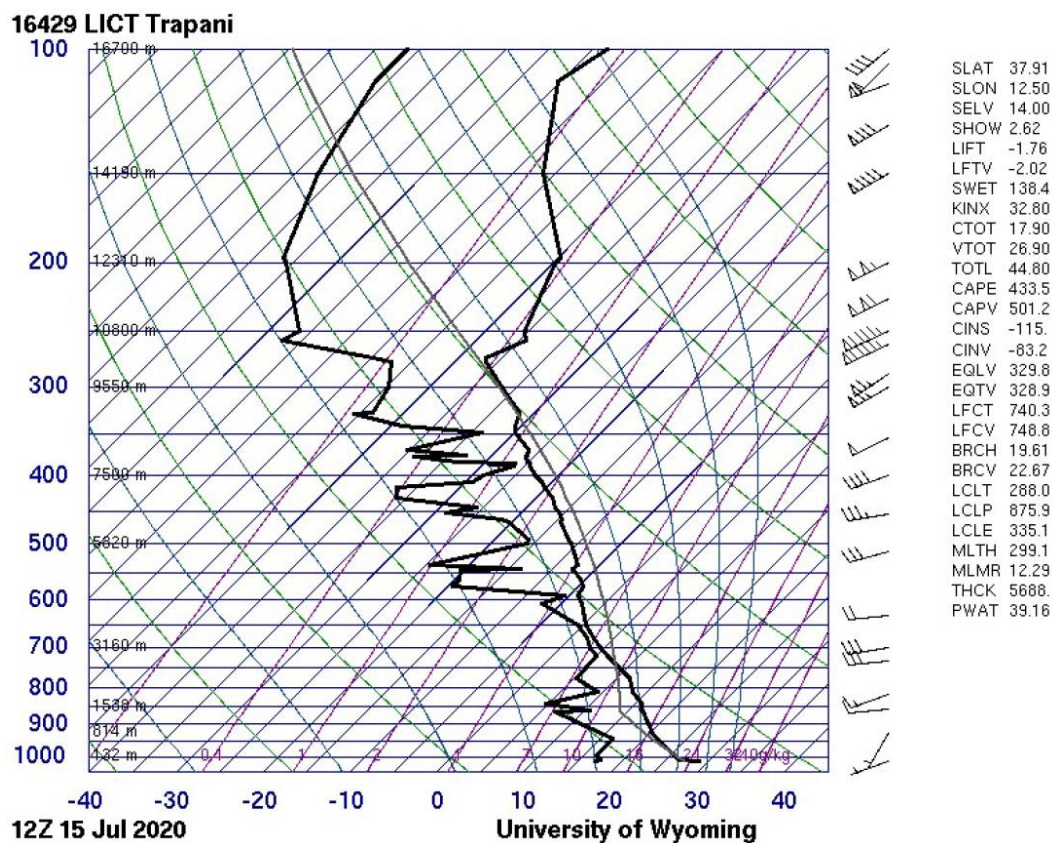

Figure S1. Thermodynamic state of the atmospheric column on 15 July 2020. Data from the radiosonde data station LICT Trapani-Birgi. Source image: University of Wyoming (<http://weather.uwyo.edu/>).

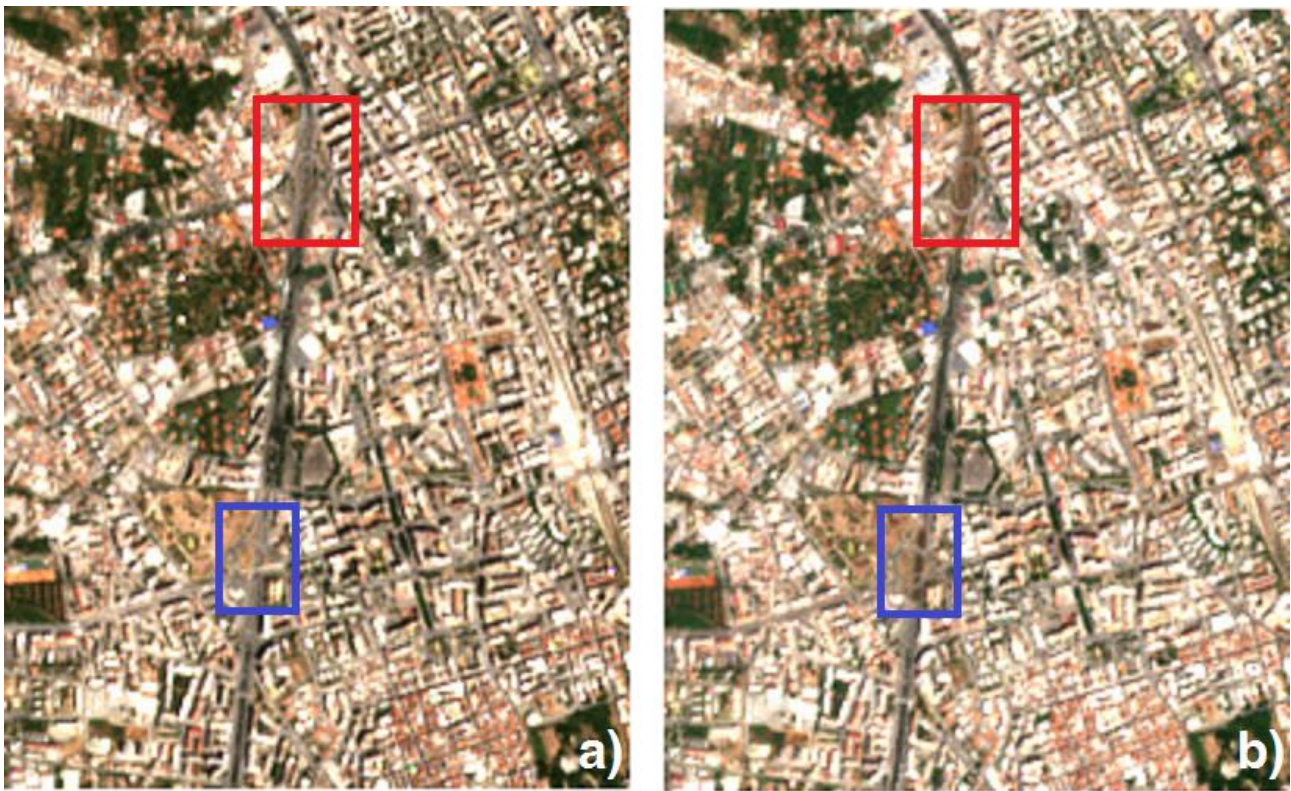

Figure S2. Sentinel-2 image of the a) 14 July 2020 at around 10:00 (i.e., the day before the flooding event) and 2) 16 July 2020 at around 09:50 (i.e., the day after the flooding event). The boxes blue and red indicate the underpasses Da Vinci and Michelangelo, respectively. Despite the not-optimal resolution of the images, it is possible to glimpse the traces left by the mud in the two underpasses the day after the flooding event. Source: Copernicus Open Access Hub (<https://scihub.copernicus.eu/dhus/#/home>).

15
